# Supplementary material for: Vaccination with ADCC activating HA peptide epitopes provides 1 partial protection from influenza infection
Source: PubMed Central journal article supplement — Vaccine. Author manuscript; Available in PMC 2020 Sep 29. (PMC7524583; doi:10.1016/j.vaccine.2020.07.008), 2020-07-25
Supplement: NIHMS1616435-supplement-1.pdf [file NIHMS1616435-supplement-1.pdf]

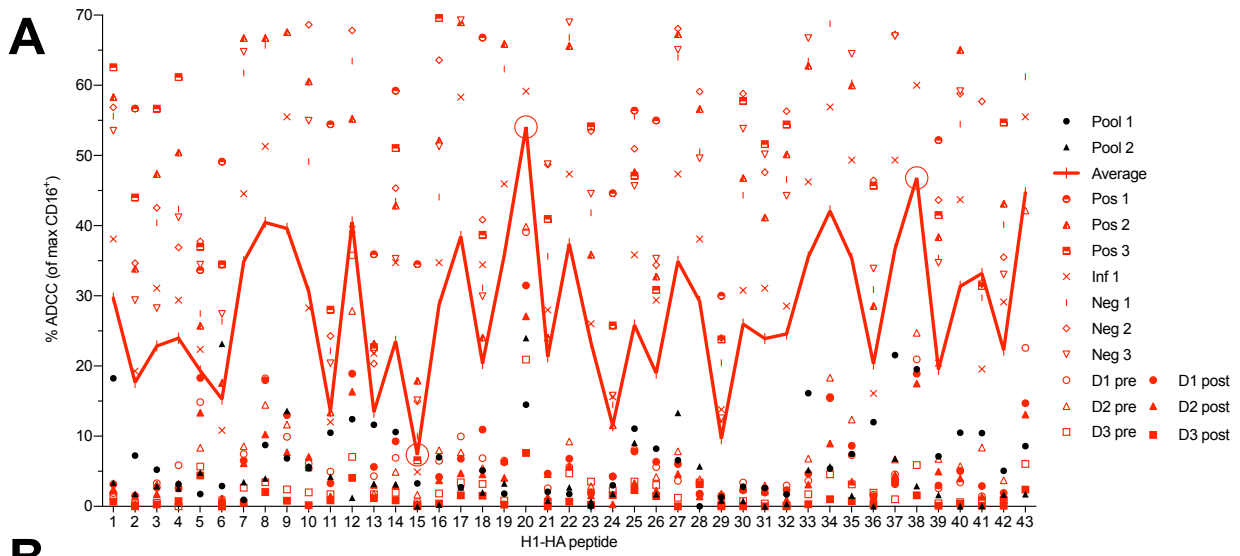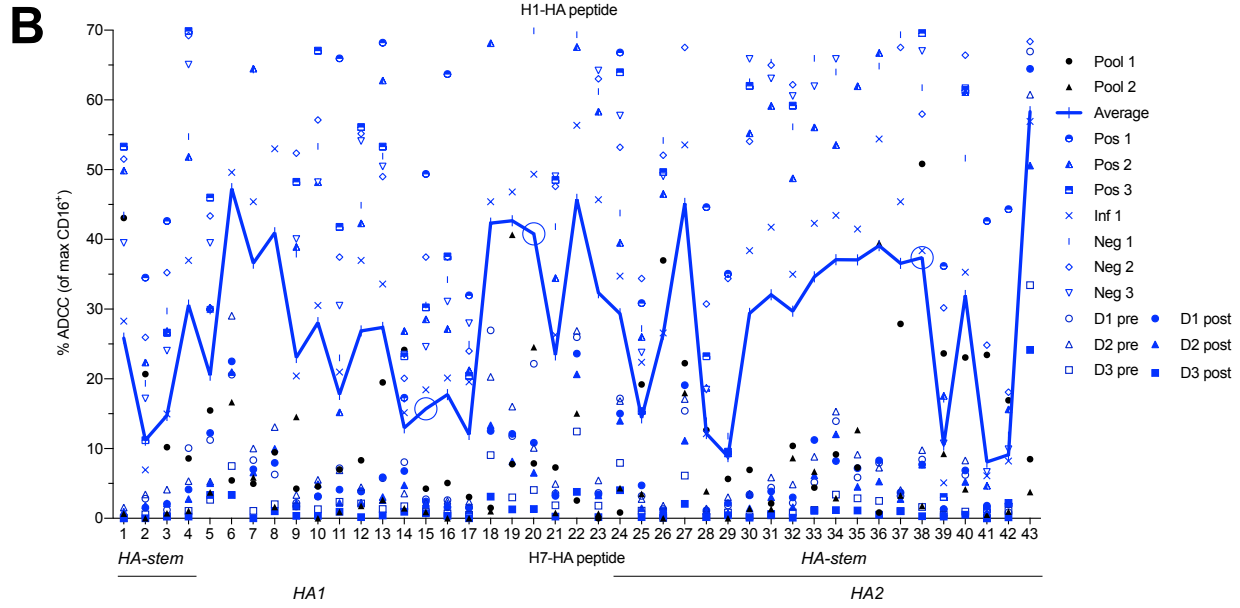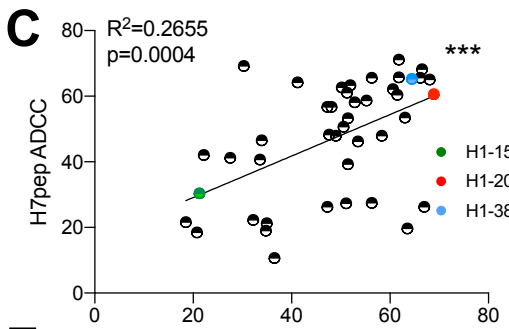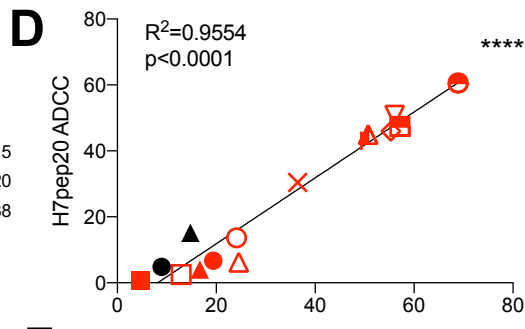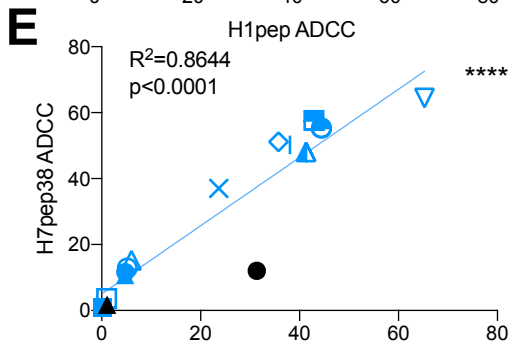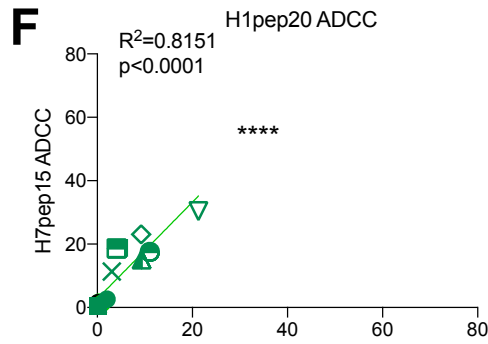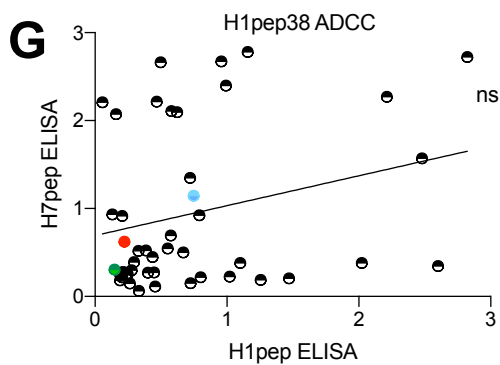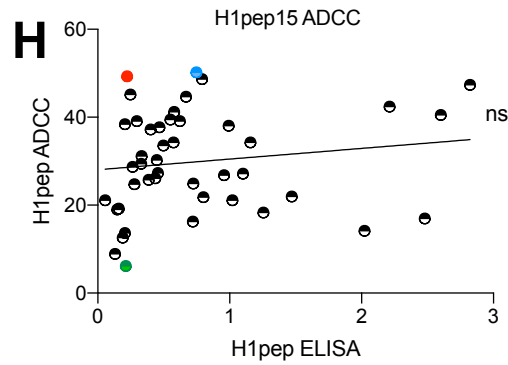

**Supplementary figure 1: ADCC antibody responses are more cross-reactive than total IgG.** (A) H1-HA and (B) H7-HA ADCC responses from overlapping peptides. Data represents the average (line) and individual (symbols). The average HApep15, 20 and 38 peptide responses are circled. Linear regression analysis for H7-HA and H1-HA peptide ADCC responses for Pos 1 donor (C), and all donors HApep20 (D), HApep38 (E) and HApep15 (F) peptides ADCC responses. H7-HA and H1-HA peptide ELISA responses for Pos 1 donor (G) and H1-HA peptide ELISA and ADCC responses for Pos 1 donor (H).

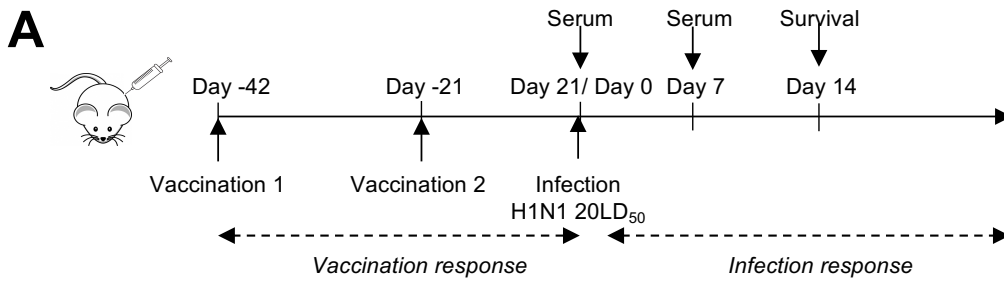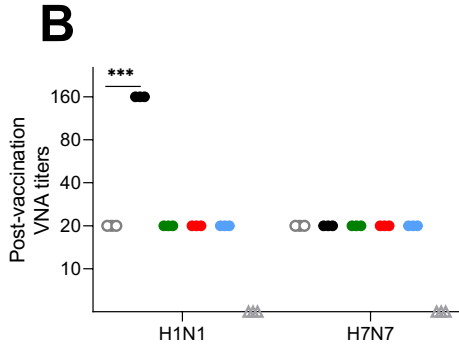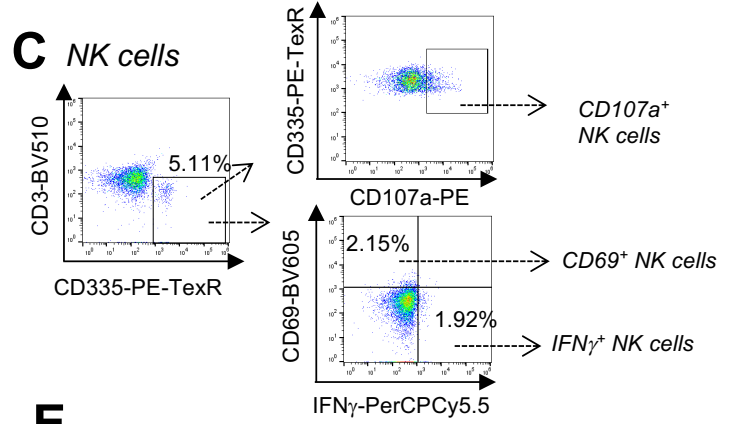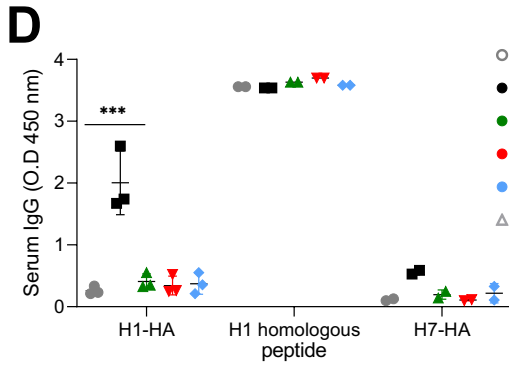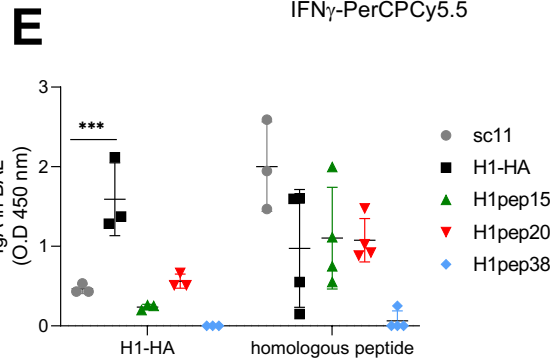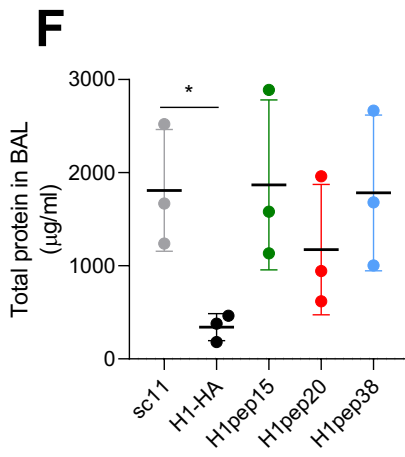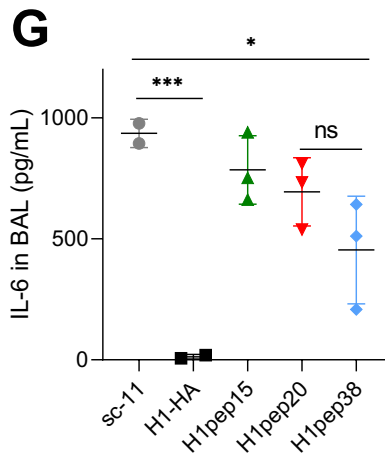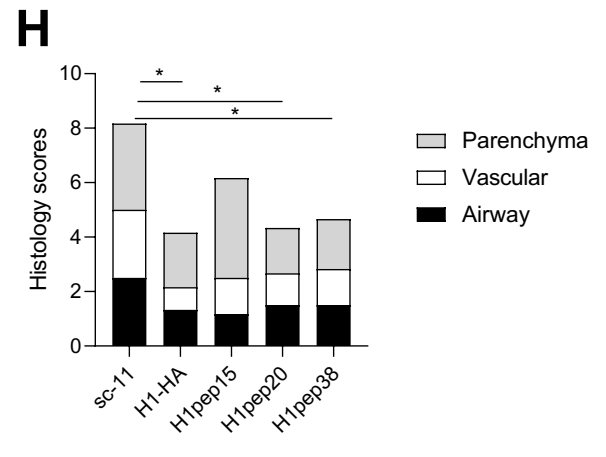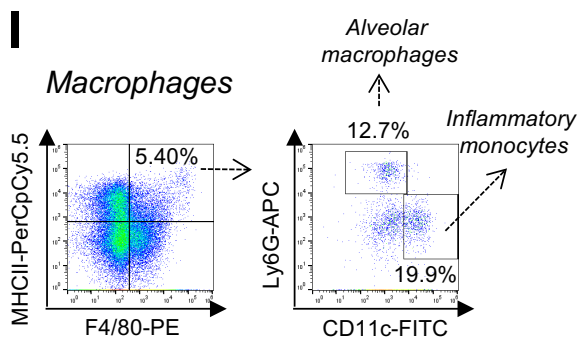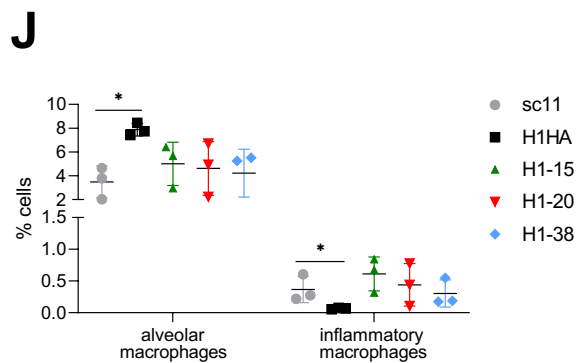

**Supplementary figure 2: Antibody response following ADCC-peptide vaccination and influenza infection.** (A) Schematic diagram of mouse vaccination and infection timeline. (B) H1N1 virus neutralizing antibodies (VNA) from day 21 post vaccination serum. (C) Representative FACS plots for NK cell activation at day 7 post infection from the lung (gated prior on FSC/SSC, live/dead). (D) H1-HA and homologous peptide IgG production in the serum by ELISA at day 7 post-infection. (E) H1-HA IgA production in BAL supernatants by ELISA at day 7 post-infection. (F) Total protein in BAL at day 7 post-infection measured by BCA assay. (G) IL-6 levels in BAL at 7 post-infection measured by ELISA. (H) Histopathology scores of airways, parenchyma and vascular murine lung tissues by H&E staining at day 7 post-challenge. (I) Representative FACS plots for Macrophage responses at day 7 post infection from the BAL (gated prior on FSC/SSC, live/dead), and % of cells in the lung. Data represents the mean average and SD. n=3 mice per group. \* shows statistical significance by one-way ANOVA with Dunnett's multiple comparison test versus PBS group, \*p<0.05, \*\*p<0.01, \*\*\*p<0.005, experiments were repeated twice.
