# Supplementary material for: Vaccination with ADCC activating HA peptide epitopes provides 1 partial protection from influenza infection
Source: PubMed Central journal article supplement — Vaccine. Author manuscript; Available in PMC 2020 Sep 29. (PMC7524583; doi:10.1016/j.vaccine.2020.07.008), 2020-07-25
Supplement: NIHMS1616435-supplement-2.pdf [file NIHMS1616435-supplement-2.pdf]

**Supplementary Table 1: Human subject information (n=12 subjects, n=15 samples)**

| <b>Donor</b> | <b>Source</b>                         | <b>Time point</b>                                        |
|--------------|---------------------------------------|----------------------------------------------------------|
| Pool 1       | Red cross buffy pack, 5 donors pooled | Donation                                                 |
| Pool 2       | Red cross buffy pack, 5 donors pooled | Donation                                                 |
| Infected 1   | Household infection study             | Day 0 (recruitment)                                      |
| Positive 1   | Household infection study             | Day 0 (baseline)                                         |
| Positive 2   | Household infection study             | Day 0                                                    |
| Positive 3   | Household infection study             | Day 0                                                    |
| Negative 1   | Household infection study             | Day 0                                                    |
| Negative 2   | Household infection study             | Day 0                                                    |
| Negative 3   | Household infection study             | Day 0                                                    |
| Donor 1 pre  | Community H1N1-2009 sero-surveillance | Donation, baseline                                       |
| Donor 1 post | Community H1N1-2009 sero-surveillance | Follow up, HAI <sup>+</sup> H1N1-2009 infection positive |
| Donor 2 pre  | Community H1N1-2009 sero-surveillance | Donation, baseline                                       |
| Donor 2 post | Community H1N1-2009 sero-surveillance | Follow up, HAI <sup>+</sup> H1N1-2009 infection positive |
| Donor 3 pre  | Community H1N1-2009 sero-surveillance | Donation, baseline                                       |
| Donor 3 post | Community H1N1-2009 sero-surveillance | Follow up, HAI <sup>+</sup> H1N1-2009 infection positive |

**Supplementary Table 2: Overlapping peptide library for stimulation and \* selected peptides for mouse vaccination.**

| Group            | aa position<br>start end | Number | H1-HA peptides                   | H7-HA peptides             | % aa<br>similarity |
|------------------|--------------------------|--------|----------------------------------|----------------------------|--------------------|
|                  | 1 25                     | 1      | MKAILVLLLYTFATANADTLCIGYH        | MNTQILVFALIAIIPNADKICLGH   | 57.1               |
|                  | 13 38                    | 2      | TANADTLCIGYHANNSTDTVDTVLE        | IPTNADKICLGHHAVSNGTKVNTLT  | 76.2               |
|                  | 26 51                    | 3      | NNSTDTVDTVLEKNVTVTHSVNLE         | AVSNGTKVNTLTERGVEVFNATETV  | 65                 |
|                  | 39 64                    | 4      | NVTVTHSVNLEDKHNGKLCCLRGV         | RGVEVFNATETVERTNIPRICKGK   | 52.6               |
|                  | 52 77                    | 5      | KHNGKLCCLRGVAPLHLGKCNIAGW        | RTNIPRICKGKRTVDLGQCGLLGT   | 60                 |
|                  | 65 90                    | 6      | PLHLGKCNIAGWILGNPECESLSTA        | TVDLGQCGLLGTITGPPQCDQFLEF  | 70.6               |
|                  | 78 103                   | 7      | LGNPECESLSTASSWSYIVETPSSD        | TGPPQCDQFLEFSADLIERREGSD   | 41.7               |
|                  | 91 116                   | 8      | SWSYIVETPSSDNGTCYPGDFIDYE        | ADLIERREGSDVCYPGKFNVEEAL   | 80                 |
|                  | 104 129                  | 9      | GTCYPGDFIDYEELREQLSSVSSFE        | CYPGKFNVEEALRQILRESGGIDKE  | 75                 |
|                  | 117 142                  | 10     | LREQLSSVSSFERFEIFPKTSSWPN        | QILRESGGIDKEAMGFTYSGIRTNG  | 100                |
|                  | 130 155                  | 11     | FEIFPKTSSWPNHDSNKGVTAAACPH       | MGFTYSGIRTNGATSACRRSGSSFY  | 83.3               |
|                  | 143 168                  | 12     | DSNKGVTAAACPHAGAKSFYKNLIWL       | TSACRRSGSSFYAEMKWLLSNTDNA  | 68.4               |
|                  | 156 181                  | 13     | GAKSFYKNLIWLVKKGNSYPKLSKS        | EMKWLLSNTDNAAFPQMTKSYKNTR  | 70.6               |
|                  | 169 194                  | 14     | KKGNSYPKLSKSYINDKGKEVLVLW        | FPQMTKSYKNTRKSPALIVWGIHHS  | 70                 |
| Low ADCC<br>HA1  | 182 207                  | 15 *   | <b>INDKGKEVLVLWGIHHPSTSADQQS</b> | SPALIVWGIHHSVSTAEQTKLYGSG  | 86.7               |
|                  | 195 220                  | 16     | IHHPSTSADQQSLYQADTYVVFVGS        | STAEQTKLYGSGNKLVTVGSSNYQQ  | 65                 |
|                  | 208 233                  | 17     | YQADTYVVFVGSRRYSKFKKPEIAI        | KLVTVGSSNYQQSFVPSGARPOVN   | 64.3               |
|                  | 221 246                  | 18     | RYSKFKKPEIAIRPKVRDQEGRMNY        | FVPSGARPOVNGLSGRIDFHWLML   | 55                 |
|                  | 234 259                  | 19     | PKVRDQEGRMNYWTLVEPGDKITF         | LSGRIDFHWLMLNPNDTVTFSFNGA  | 77.8               |
| High ADCC<br>HA1 | 247 272                  | 20 *   | <b>WTLVEPGDKITFEATGNLVVPRYAF</b> | PNDTVTFSFNGAFIAPDRASFLRGK  | 50                 |
|                  | 260 285                  | 21     | ATGNLVVPRYAFAMERNAGSGIIIS        | IAPDRASFLRGKSMGIQSGVQVDAN  | 56.2               |
|                  | 273 298                  | 22     | MERNAGSGIIISDTPVHDCNTTCQT        | MGIQSGVQVDANCEGDCYHSGGTII  | 46.2               |
|                  | 286 311                  | 23     | TPVHDCNTTCQTPKGAINSTLPPFQ        | EGDCYHSGGTIISNLPPFQIDSRV   | 62.5               |
|                  | 299 324                  | 24     | KGAINSTLPPFQNIHPITIGKCPKYV       | NLPPFQIDSRVAVGKCPRYVKQRSLL | 78.9               |
|                  | 312 337                  | 25     | HPITIGKCPKYVKSTKLRLATGLRN        | KCPRYVKQRSLLLATGMKNVPEIPK  | 78.9               |
|                  | 325 350                  | 26     | STKLRLATGLRNIPSIQSRGLFGAI        | ATGMKNVPEIPKGRGLFGAIAGFIE  | 85                 |
|                  | 338 363                  | 27     | PSIQSRGLFGAIAFGIEGGWTGMVD        | RGLFGAIAFGIENGWEGLIDGWYGF  | 90                 |
|                  | 351 376                  | 28     | GFIEGGWTGMVDGWYGYHHQNEQGS        | GWEGLIDGWYGRFHQNAQEGETAAD  | 84.2               |
|                  | 364 389                  | 29     | WYGYHHQNEQGSYAADLKSTQNAI         | HQNAQEGETAADYKSTQSAIDQITG  | 80                 |
|                  | 377 402                  | 30     | YAADLKSTQNAIDEITNKVNSVIEK        | KSTQSAIDQITGKLNRLIEKTNQQF  | 90                 |
|                  | 390 415                  | 31     | EITNKVNSVIEKMNTQFTAVGKEFN        | LNRLIEKTNQQFELIDNEFNEVEKQ  | 65                 |
|                  | 403 428                  | 32     | NTQFTAVGKEFNHLEKRIENLNKKV        | LIDNEFNEVEKQIGNVINWTRDSIT  | 73.3               |
|                  | 416 441                  | 33     | LEKRIENLNKKVDDGFLDIWYNAE         | GNVINWTRDSITEVWSYNAELLVAM  | 75                 |
|                  | 429 454                  | 34     | DGFLDIWYNAELLVLENERLTDY          | VWSYNAELLVAMENQHTIDLADSEM  | 89.5               |
|                  | 442 467                  | 35     | LVLENERLTDYHDSNVKNLYEKVR         | NQHTIDLADSEMCKLYERVKRQLRE  | 70                 |
|                  | 455 480                  | 36     | DSNVKNLYEKVRSQKNNAKEIGNG         | KLYERVKRQLRENAEEDGTGCFEIF  | 78.9               |
|                  | 468 493                  | 37     | QLKNNAKEIGNGCFEFYHKCDNTCM        | AEEDGTGCFEIFHKCDDDCMASIRN  | 80                 |
| High ADCC<br>HA2 | 481 506                  | 38 *   | <b>FEFYHKCDNTCMESVKNGTYDYPKY</b> | KCDDDCMASIRNNTYDHSKYREEAM  | 80                 |
|                  | 494 519                  | 39     | SVKNGTYDYPKYSEEAKLNREEIDG        | TYDHSKYREEAMQNRIQIDPVKLSS  | 73.7               |
|                  | 507 532                  | 40     | EEAKLNREEIDGVKLESTRIYQILA        | NRIQIDPVKLSSGYKDVILWFSFGA  | 75                 |
|                  | 520 545                  | 41     | KLESTRIYQILAIYSTVASSLVLVV        | YKDVILWFSFGASCFILLAIVMGLV  | 60                 |
|                  | 533 558                  | 42     | YSTVASSLVLVVSLGAIWFMCNSG         | CFILLAIVMGLVFCVKNGNMRCTI   | 55.6               |
|                  | 546 571                  | 43     | LGAIWFMCNSGSLQCRICI              | ICVKNGNMRCTICI             | 90                 |
| Negative         | Scrambled (H1-20) *      |        | <b>TKPRVFYLAITPEWNVFVGLTDGA</b>  |                            |                    |
